# Supplementary material
Source: publisher figshare collection journal article supplement (https://gsajournals.figshare.com/ndownloader/files/23775764)
Supplement: Supplementary file 1 [file 23775764]

Archive with 2 entries (2 files):
- Supplemental_Tables_reviewed.xlsx
- supfigures_legends.pdf
