# Supplementary material
Source: publisher figshare collection journal article supplement (https://gsajournals.figshare.com/ndownloader/files/23775764)
Supplement: Supplementary file 1 [file 23775764 › Supplemental_Tables_reviewed.xlsx]

## Sheet: Table S1
Table S1. HER1410 genome assembly statistics.
Assembly information	Illumina sequencing	Hybrid assembly
		Chromosome	pLUSID1	pLUSID2	pLUSID3
Assembly size (bp)	5721631	5585577	368179	155569	38150
Number of contigs	425	1	1	1	1
G+C content (%)	34.94	35.4	32.3	35.3	34.4
Largest contig (bp)	315344
N50 (bp)	43799
L50	40
Estimated coverage (times X)	55
Ratio of element coverage to chromosomal (times X)		1	1.14	2.37	2.33

## Sheet: Table S2
Table S2. Annotation information and number and percentage of genes assigned to COG categories for HER1410 genome.
Annotation information
	Chromosome		pLUSID1		pLUSID2		pLUSID3		Total
CDS	5555		302		147		55		6059
tRNA genes	105		1		0		0		106
rRNA genes	42		0		0		0		42
Hypothetical proteins	684		79		23		22		808
Proteins with functional assignments	4871		223		124		33		5251
COG Annotation	Gene number	Gene percent (%)	Gene number	Gene percent (%)	Gene number	Gene percent (%)	Gene number	Gene percent (%)
CDS assigned to COG categories	4547	1	185	1	121	1	30	1
Assigned to multiple COG categories	266	0.0585001	8	0.0432432	11	0.0909091	0	0
Energy production and conversion [C]	206	0.0453046	4	0.0216216	4	0.0330579	1	0.0333333
Cell cycle control, cell division, chromosome partitioning [D]	56	0.0123158	4	0.0216216	0	0	1	0.0333333
Amino acid transport and metabolism [E]	334	0.073455	12	0.0648649	7	0.0578512	1	0.0333333
Nucleotide transport and metabolism [F]	131	0.0288102	1	0.00540541	2	0.0165289	0	0
Carbohydrate transport and metabolism [G]	158	0.0347482	4	0.0216216	7	0.0578512	0	0
Coenzyme transport and metabolism [H]	123	0.0270508	1	0.00540541	2	0.0165289	0	0
Lipid transport and metabolism [I]	105	0.0230921	5	0.027027	2	0.0165289	0	0
Translation, ribosomal structure and biogenesis [J]	211	0.0464042	4	0.0216216	5	0.0413223	0	0
Transcription [K]	391	0.0859908	20	0.108108	4	0.0330579	2	0.0666667
Replication, recombination and repair [L]	355	0.0780735	38	0.205405	14	0.115702	4	0.133333
Cell wall/membrane/envelope biogenesis [M]	232	0.0510227	8	0.0432432	2	0.0165289	2	0.0666667
Cell motility [N]	36	0.00791731	0	0	1	0.00826446	0	0
Post-translational modification, protein turnover, and chaperones [O]	79	0.0173741	3	0.0162162	3	0.0247934	0	0
Inorganic ion transport and metabolism [P]	216	0.0475038	4	0.0216216	12	0.0991736	0	0
Secondary metabolites biosynthesis, transport, and catabolism [Q]	69	0.0151748	10	0.0540541	1	0.00826446	0	0
Function unknown [S]	1295	0.284803	37	0.2	36	0.297521	19	0.633333
Signal transduction mechanisms [T]	135	0.0296899	2	0.0108108	5	0.0413223	0	0
Intracellular trafficking, secretion, and vesicular transport [U]	36	0.00791731	7	0.0378378	2	0.0165289	0	0
Defense mechanisms [V]	113	0.0248516	13	0.0702703	1	0.00826446	0	0

## Sheet: Table S3
Table S3. Chromosomal and extrachromosomal features detected in this work (Figures 1, 2 and 3).
Name	Start	End	Type	Location	Source	Add. Information
196amr___(Bla)BLA-1|AY453161|501-1430|930	2452902	2453829	Antibiotic Resistance Gene	chromosome	bTyper
418amr___(Bla)bla2|NG_047224|101-874|774	3358728	3357955	Antibiotic Resistance Gene	chromosome	bTyper
465amr___(Gly)vanR-M|FJ349556|982-1680|699	4806159	4805461	Antibiotic Resistance Gene	chromosome	bTyper
521amr___(Gly)vanZF-Pp|AF155139|4339-4959|621	923461	924048	Antibiotic Resistance Gene	chromosome	bTyper
622amr___(Fcyn)fosBx1|NG_050591|101-517|417	1952068	1952484	Antibiotic Resistance Gene	chromosome	bTyper
bceT	2003093	2004157	Toxin	chromosome	bTyper
bpsD	5354504	5355067	Toxin	chromosome	bTyper
bpsE	5355158	5355991	Toxin	chromosome	bTyper
bpsF	5358880	5359494	Toxin	chromosome	bTyper
bpsH	5337208	5338119	Toxin	chromosome	bTyper
cerB	626760	627692	Toxin	chromosome	bTyper
clo	5072426	5073952	Toxin	chromosome	bTyper
Cry1Ba4	24393	20710	Crystal protein	chromosome	bTyper3
cytK2	1061142	1062149	Toxin	chromosome	bTyper
entA	5302941	5303828	Toxin	chromosome	bTyper
entFM	1872838	1874127	Toxin	chromosome	bTyper
hblA	3067619	3068743	Toxin	chromosome	bTyper
hblB	3065844	3067241	Toxin	chromosome	bTyper
hblC	3070065	3071381	Toxin	chromosome	bTyper
hblD	3068783	3070000	Toxin	chromosome	bTyper
hlyII	3445798	3447033	Toxin	chromosome	bTyper
hlyR	3442628	3443230	Toxin	chromosome	bTyper
inhA1	1223556	1225919	Toxin	chromosome	bTyper
inhA2	616215	618611	Toxin	chromosome	bTyper
island01	16648	34086	Genomic island	chromosome	Island Viewer 4
island02	859683	899402	Genomic island	chromosome	Island Viewer 4
island03	958086	969217	Genomic island	chromosome	Island Viewer 4
island04	1751871	1769124	Genomic island	chromosome	Island Viewer 4
island05	1784457	1825657	Genomic island	chromosome	Island Viewer 4
island06	2194597	2206682	Genomic island	chromosome	Island Viewer 4
island07	2353471	2361290	Genomic island	chromosome	Island Viewer 4
island08	2371620	2439108	Genomic island	chromosome	Island Viewer 4
island09	2572953	2612081	Genomic island	chromosome	Island Viewer 4
island10	2962086	2984231	Genomic island	chromosome	Island Viewer 4
island11	3332894	3346209	Genomic island	chromosome	Island Viewer 4
island12	3470632	3482879	Genomic island	chromosome	Island Viewer 4
island13	3632410	3658489	Genomic island	chromosome	Island Viewer 4
island14	3757510	3782638	Genomic island	chromosome	Island Viewer 4
island15	4503429	4534806	Genomic island	chromosome	Island Viewer 4
island16	4738142	4746021	Genomic island	chromosome	Island Viewer 4
island17	4770178	4778754	Genomic island	chromosome	Island Viewer 4
island18	4894247	4915215	Genomic island	chromosome	Island Viewer 4
island19	5019016	5030837	Genomic island	chromosome	Island Viewer 4
island20	5091287	5097570	Genomic island	chromosome	Island Viewer 4
island21	5113986	5127171	Genomic island	chromosome	Island Viewer 4
island22	5181706	5206078	Genomic island	chromosome	Island Viewer 4
island23	5181706	5206078	Genomic island	chromosome	Island Viewer 4
nheA	1747671	1748828	Toxin	chromosome	bTyper
nheB	1748869	1750074	Toxin	chromosome	bTyper
nheC	1750185	1751261	Toxin	chromosome	bTyper
plcA	3699401	3700387	Toxin	chromosome	bTyper
plcR	5429727	5430581	Toxin	chromosome	bTyper
prophage1	388239	414835	Prophage	chromosome	PHASTER	incomplete
prophage2	1473771	1487996	Prophage	chromosome	PHASTER	incomplete
prophage3	2330576	2357889	Prophage	chromosome	PHASTER	incomplete
prophage4	3139785	3146541	Prophage	chromosome	PHASTER	incomplete
prophage5	3632410	3658598	Prophage	chromosome	PHASTER	incomplete
prophage6	4376166	4423445	Prophage	chromosome	PHASTER	intact
prophage7	4885095	4924353	Prophage	chromosome	PHASTER	incomplete
prophage8	5080871	5147824	Prophage	chromosome	PHASTER	intact
prophage9	5132546	5214549	Prophage	chromosome	PHASTER	intact
sph	626691	627692	Toxin	chromosome	bTyper
IS231H	762	2198	annotation	chromosome	ISFinder
IS231S	2465	3895	annotation	chromosome	ISFinder
IS231Y	4739	6169	annotation	chromosome	ISFinder
IS231Y	11465	12088	annotation	chromosome	ISFinder
IS231Y	12229	13659	annotation	chromosome	ISFinder
IS231S	14537	15967	annotation	chromosome	ISFinder
IS231Y	16811	18241	annotation	chromosome	ISFinder
IS231S	18473	19903	annotation	chromosome	ISFinder
IS231H	20135	21571	annotation	chromosome	ISFinder
ABC transporter ATP-binding protein CDS	68258	69163	annotation	pLUSID1	PGAP
ABC transporter ATP-binding protein CDS	86421	87287	annotation	pLUSID1	PGAP
ABC transporter ATP-binding protein CDS	90284	91993	annotation	pLUSID1	PGAP
ABC transporter ATP-binding protein CDS	134324	135037	annotation	pLUSID1	PGAP
ABC transporter ATP-binding protein CDS	172070	172993	annotation	pLUSID1	PGAP
ABC transporter ATP-binding protein CDS	194680	195441	annotation	pLUSID1	PGAP
ABC transporter permease CDS	69907	70605	annotation	pLUSID1	PGAP
ABC transporter permease CDS	173745	174455	annotation	pLUSID1	PGAP
ABC transporter permease subunit CDS	69166	69891	annotation	pLUSID1	PGAP
ABC transporter permease subunit CDS	172986	173732	annotation	pLUSID1	PGAP
ABC-2 transporter permease CDS	85784	86431	annotation	pLUSID1	PGAP
alpha/beta-type small acid-soluble spore protein CDS	323451	323666	annotation	pLUSID1	PGAP
bacitracin synthetase	16984	19635	annotation	pLUSID1	PGAP
Bacterial dnaA protein	270149	270901	annotation	pLUSID1	eggNOG mapper
cell division protein FtsZ CDS	267251	268705	annotation	pLUSID1	PGAP
Cell division protein tadZ	261440	262933	annotation	pLUSID1	eggNOG mapper
conjugal transfer protein TraG CDS	274910	276055	annotation	pLUSID1	PGAP
conjugal transfer protein TraG CDS	278591	278764	annotation	pLUSID1	PGAP
conjugal transfer protein TraG CDS	281302	281571	annotation	pLUSID1	PGAP
Conjugation protein, TraG/TraD family	287066	288766	annotation	pLUSID1	PHMMER
cyclic peptide export ABC transporter CDS	36143	39226	annotation	pLUSID1	PGAP
endospore germination permease CDS	115390	116492	annotation	pLUSID1	PGAP
Ger(x)C family spore germination protein CDS	114266	115393	annotation	pLUSID1	PGAP
hblA	306297	307415	Toxin	pLUSID1	bTyper
hblC	303643	304959	Toxin	pLUSID1	bTyper
hblD	305024	306241	Toxin	pLUSID1	bTyper
island24	202312	210552	Genomic island	pLUSID1	Island Viewer 4
island25	350798	359155	Genomic island	pLUSID1	Island Viewer 4
lanM CDS	168551	171622	annotation	pLUSID1	PGAP
peptidase domain-containing ABC transporter CDS	175081	177297	annotation	pLUSID1	PGAP
plantaricin C family lantibiotic CDS	166538	166786	annotation	pLUSID1	PGAP
plantaricin C family lantibiotic CDS	167094	167342	annotation	pLUSID1	PGAP
plantaricin C family lantibiotic CDS	167651	167899	annotation	pLUSID1	PGAP
plantaricin C family lantibiotic CDS	168138	168386	annotation	pLUSID1	PGAP
prophage10	323451	335587	Prophage	pLUSID1	PHASTER	incomplete
prophage11	347997	359897	Prophage	pLUSID1	PHASTER	incomplete
S-layer homology domain protein	256455	258809	annotation	pLUSID1	PHMMER
S-layer homology domain-containing protein CDS	165970	166275	annotation	pLUSID1	PGAP
S-layer protein CDS	106402	109005	annotation	pLUSID1	PGAP
spore germination protein CDS	116479	117987	annotation	pLUSID1	PGAP
Zeta toxin	330370	331116	annotation	pLUSID1	eggNOG mapper
Hypothetical tellurium resistance protein	4133	5764	annotation	pLUSID2	PGAP
island26	113051	124448	Genomic island	pLUSID2	Island Viewer 4
prophage12	97184	133465	Prophage	pLUSID2	PHASTER	incomplete
Putative tellurium resistance protein	5874	6665	annotation	pLUSID2	PGAP
Putative tellurium resistance protein	8009	8605	annotation	pLUSID2	PGAP
Spore coat N-acetylmuramic acid deacetylase	132564	133346	annotation	pLUSID2	PGAP
Spore coat protein B	74461	74910	annotation	pLUSID2	PGAP
Spore coat protein B	74931	75446	annotation	pLUSID2	PGAP
Sporulation kinase	70762	71988	annotation	pLUSID2	PGAP
Tellurite resistance protein	3032	4114	annotation	pLUSID2	PGAP
Tellurium resistance protein terD	6738	7316	annotation	pLUSID2	PGAP
Tellurium resistance protein terD	7402	7986	annotation	pLUSID2	PGAP
island27	12262	15296	Genomic island	pLUSID3	Island Viewer 4
prophage13	56	37977	Prophage	pLUSID3	PHASTER	questionable
Secondary metabolite region 1	1190924	1214430	Secondary metabolite region (SMR)	chromosome	antiSMASH	[type] LAP,bacteriocin;
Secondary metabolite region 2	1772192	1836802	Secondary metabolite region	chromosome	antiSMASH	[type] NRPS,transAT-PKS
Secondary metabolite region 3	1896258	1909965	Secondary metabolite region	chromosome	antiSMASH	[type] siderophore; [Most similar known cluster (similarity)] petrobactin (100%)
Secondary metabolite region 4	2225189	2273586	Secondary metabolite region	chromosome	antiSMASH	[type] NRPS; [Most similar known cluster (similarity)] bacillibactin (46%)
Secondary metabolite region 5	2366248	2433264	Secondary metabolite region	chromosome	antiSMASH	[type] NRPS; [Most similar known cluster (similarity)] nostopeptolide A2 (25%)
Secondary metabolite region 6	2452611	2477849	Secondary metabolite region	chromosome	antiSMASH	[type] betalactone; [Most similar known cluster (similarity)] fengycin (40%)
Secondary metabolite region 7	2547273	2556837	Secondary metabolite region	chromosome	antiSMASH	[type] bacteriocin
Secondary metabolite region 8	2611296	2621532	Secondary metabolite region	chromosome	antiSMASH	[type] bacteriocin
Secondary metabolite region 9	2645932	2692948	Secondary metabolite region	chromosome	antiSMASH	[type] NRPS
Secondary metabolite region 10	3485386	3507239	Secondary metabolite region	chromosome	antiSMASH	[type] terpene; [Most similar known cluster (similarity)] molybdenum cofactor (11%)
Secondary metabolite region 11	1	75709	Secondary metabolite region	pLUSID1	antiSMASH	[type] NRPS,T1PKS,lanthipeptide; [Most similar known cluster (similarity)] zwittermicin A (96%)
Secondary metabolite region 12	78731	100119	Secondary metabolite region	pLUSID1	antiSMASH	[type] sactipeptide; [Most similar known cluster (similarity)] thurincin H (70%)
Secondary metabolite region 13	158551	182297	Secondary metabolite region	pLUSID1	antiSMASH	[type] lanthipeptide,bacteriocin
Secondary metabolite region 14	5225	48806	Secondary metabolite region	pLUSID2	antiSMASH	[type] NRPS-like

## Sheet: Table S4
Table S4. Detailed annotation of pLUSID3. Closest homolog for pgap, eggNOGmapper, PHMMER and PHASTER are shown for each locus.
Locus	Start	End	PGAP	PHMMER	eggNOG mapper	PHASTER
HBA75_30790	56	1459	recombinase family protein CDS	Resolvase	Recombinase	PHAGE_Bacill_BM5_NC_029069: hypothetical protein; HBA75_30790; phage(gi985757806)
HBA75_30795	1572	1790	helix-turn-helix transcriptional regulator CDS	HTH cro/C1-type domain-containing protein	Helix-turn-helix XRE-family like proteins	PHAGE_Bacill_SPbeta_NC_001884: hypothetical protein; HBA75_30795; phage(gi9630214)
HBA75_30800	1806	2489	helix-turn-helix domain-containing protein CDS	Gp28	sequence-specific DNA binding	PHAGE_Brocho_NF5_NC_015252: gp28; HBA75_30800; phage(gi327197613)
HBA75_30805	2640	2912	helix-turn-helix transcriptional regulator CDS	XRE family transcriptional regulator	Helix-turn-helix XRE-family like proteins	PHAGE_Staphy_StauST398_2_NC_021323: phage transcriptional regulator; HBA75_30805; phage(gi509139885)
HBA75_30810	2978	3133	hypothetical protein CDS			hypothetical protein; HBA75_30810
HBA75_30815	3206	3406	hypothetical protein CDS	Uncharacterized protein		hypothetical protein; HBA75_30815
HBA75_30820	3421	3771	hypothetical protein CDS	Uncharacterized protein		hypothetical protein; HBA75_30820
HBA75_30825	3792	4439	sigma-70 family RNA polymerase sigma factor CDS	RNA-polymerase sigma-factor	sigma factor activity	PHAGE_Bacill_phIS3501_NC_019502: RNA-polymerase sigma-factor; HBA75_30825; phage(gi422934306)
HBA75_30830	4676	4873	hypothetical protein CDS	Uncharacterized protein		PHAGE_Bacill_phiNIT1_NC_021856: hypothetical protein; HBA75_30830; phage(gi526118538)
HBA75_30835	4870	5220	hypothetical protein CDS	Mucoperlin mucin-like nacre protein		PHAGE_Bacill_phBC6A51_NC_004820: hypothetical protein; HBA75_30835; phage(gi31415766)
HBA75_30840	5220	5537	hypothetical protein CDS	Uncharacterized protein		hypothetical protein; HBA75_30840
HBA75_30845	5485	5685	hypothetical protein CDS	Uncharacterized protein		hypothetical protein; HBA75_30845
HBA75_30850	5687	5878	hypothetical protein CDS	TPR_REGION domain-containing protein		hypothetical protein; HBA75_30850
HBA75_30855	5884	6555	AAA family ATPase CDS	Phage nucleotide-binding protein	AAA domain	PHAGE_Lister_LP_030_2_NC_021539: DNA-binding protein; HBA75_30855; phage(gi514051989)
HBA75_30860	6576	7049	DUF669 domain-containing protein CDS	Porphobilinogen deaminase	Protein of unknown function (DUF669)	PHAGE_Bacill_phi105_NC_004167: hypothetical protein; HBA75_30860; phage(gi22855034)
HBA75_30865	7121	9475	DNA primase CDS	Putative DNA primase/helicase	D5 N terminal like	PHAGE_Bacill_phi105_NC_004167: hypothetical protein; HBA75_30865; phage(gi22855035)
HBA75_30870	9756	9998	hypothetical protein CDS	Putative DNA primase/helicase		hypothetical protein; HBA75_30870
HBA75_30875	9995	10423	hypothetical protein CDS	Uncharacterized protein		PHAGE_Bacill_BM5_NC_029069: hypothetical protein; HBA75_30875; phage(gi985757877)
HBA75_30880	10426	10833	hypothetical protein CDS	Phage protein	YopX protein	PHAGE_Bacill_phBC6A51_NC_004820: hypothetical protein; HBA75_30880; phage(gi31415765)
HBA75_30885	10830	11369	nuclease CDS	ERCC4 domain-containing protein	ERCC4 domain	PHAGE_Bacill_BM5_NC_029069: hypothetical protein; HBA75_30885; phage(gi985757878)
HBA75_30890	11443	11880	hypothetical protein CDS	Uncharacterized protein		PHAGE_Bacill_BM5_NC_029069: hypothetical protein; HBA75_30890; phage(gi985757880)
HBA75_30895	12262	12552	hypothetical protein CDS	Nitric oxide synthase-like protein (Fragment)		hypothetical protein; HBA75_30895
HBA75_30900	12732	13127	DUF1492 domain-containing protein CDS	Sigma70_r4 domain-containing protein	sigma factor activity	PHAGE_Bacill_Gamma_NC_007458: conserved phage protein; HBA75_30900; phage(gi77020164)
HBA75_30905	13393	13596	hypothetical protein CDS	Uncharacterized protein		PHAGE_Bacill_BMBtpLA_NC_028748: hypothetical protein; HBA75_30905; phage(gi971482546)
HBA75_30910	13637	13978	hypothetical protein CDS	Uncharacterized protein		hypothetical protein; HBA75_30910
HBA75_30915	14097	14378	hypothetical protein CDS	Uncharacterized protein		PHAGE_Bacill_phBC6A52_NC_004821: hypothetical protein; HBA75_30915; phage(gi31415845)
HBA75_30920	14375	14740	HNH endonuclease CDS	HNH endonuclease	HNH endonuclease	PHAGE_Bacill_phBC6A52_NC_004821: endonuclease; HBA75_30920; phage(gi31415846)
HBA75_30925	14862	15296	P27 family phage terminase small subunit CDS	Uncharacterized protein		PHAGE_Bacill_phBC6A52_NC_004821: Terminase small subunit; HBA75_30925; phage(gi31415847)
HBA75_30930	15293	17017	terminase large subunit CDS	Terminase	Terminase	PHAGE_Bacill_phBC6A52_NC_004821: Terminase large subunit; HBA75_30930; phage(gi31415848)
HBA75_30935	17033	18238	phage portal protein CDS	Portal protein	Phage portal protein	PHAGE_Bacill_phBC6A52_NC_004821: Portal protein; HBA75_30935; phage(gi31415850)
HBA75_30940	18207	18785	HK97 family phage prohead protease CDS	HK97 family phage prohead protease	Caudovirus prohead serine protease	PHAGE_Clostr_phi3626_NC_003524: putative prohead protease; HBA75_30940; phage(gi20065968)
HBA75_30945	18787	20160	phage major capsid protein CDS	Phage major capsid protein	Phage capsid family	PHAGE_Bacill_phBC6A52_NC_004821: prohead protease; HBA75_30945; phage(gi31415852)
HBA75_30950	20164	20424	phage gp6-like head-tail connector protein CDS	Uncharacterized protein	Phage gp6-like head-tail connector protein	PHAGE_Bacill_phBC6A52_NC_004821: hypothetical protein; HBA75_30950; phage(gi31415853)
HBA75_30955	20405	20734	head-tail adaptor protein CDS	Head-tail joining protein	Phage head-tail joining protein	PHAGE_Bacill_phBC6A52_NC_004821: hypothetical protein; HBA75_30955; phage(gi31415854)
HBA75_30960	20724	21053	hypothetical protein CDS	Uncharacterized protein		PHAGE_Bacill_phBC6A52_NC_004821: hypothetical protein; HBA75_30960; phage(gi31415855)
HBA75_30965	21053	21430	HK97 gp10 family phage protein CDS	Uncharacterized protein	Bacteriophage HK97-gp10, putative tail-component	PHAGE_Bacill_phBC6A52_NC_004821: hypothetical protein; HBA75_30965; phage(gi31415856)
HBA75_30970	21442	22077	phage tail protein CDS	Tail protein		PHAGE_Bacill_phBC6A52_NC_004821: hypothetical protein; HBA75_30970; phage(gi31415857)
HBA75_30975	22089	22475	hypothetical protein CDS	Phage protein		PHAGE_Bacill_phBC6A52_NC_004821: hypothetical protein; HBA75_30975; phage(gi31415858)
HBA75_30980	22514	22702	hypothetical protein CDS	Uncharacterized protein		PHAGE_Lactob_PLE2_NC_031036: hypothetical protein; HBA75_30980; phage(gi100013)
HBA75_30985	22719	26000	phage tail tape measure protein CDS	Tail length tape-measure protein	minor tail protein	PHAGE_Bacill_phBC6A52_NC_004821: hypothetical protein; HBA75_30985; phage(gi31415859)
HBA75_30990	26001	26720	phage tail protein CDS	Phage tail protein	PFAM Phage tail protein	PHAGE_Lactob_Lj928_NC_005354: hypothetical protein; HBA75_30990; phage(gi41179329)
HBA75_30995	26721	28244	lysin CDS	Lysin	Prophage endopeptidase tail	PHAGE_Clostr_phi8074_B1_NC_019924: putative phage tail protein; HBA75_30995; phage(gi431810378)
HBA75_31000	28231	30036	hypothetical protein CDS	Uncharacterized protein	Pectate lyase superfamily protein	PHAGE_Serrat_phiMAM1_NC_020083: putative pectate lyase; HBA75_31000; phage(gi440789306)
HBA75_31005	30056	30346	hypothetical protein CDS	Uncharacterized protein		hypothetical protein; HBA75_31005
HBA75_31010	30453	31757	O-antigen ligase family protein CDS	Uncharacterized protein		O-antigen ligase family protein; HBA75_31010
HBA75_31015	31795	32361	serine acetyltransferase CDS	Serine acetyltransferase	Bacterial transferase hexapeptide (six repeats)	PHAGE_Strept_9871_NC_031069: hypothetical protein; HBA75_31015; phage(gi100019)
HBA75_31020	32426	32662	bacteriocin biosynthesis protein CDS	Uncharacterized protein	Pfam:Holin_BhlA	PHAGE_Bacill_VMY22_NC_028789: bacteriocin biosynthesis protein; HBA75_31020; phage(gi971743636)
HBA75_31025	32662	33216	N-acetylmuramoyl-L-alanine amidase CDS			PHAGE_Bacill_phBC6A52_NC_004821: N-acetylmuramoyl-L-alanine amidase; HBA75_31025; phage(gi31415865)
HBA75_31030	33253	33465	N-acetylmuramoyl-L-alanine amidase CDS			PHAGE_Bacill_phi4J1_NC_029008: N-acetylmuramoyl-L-alanine amidase; HBA75_31030; phage(gi971821605)
HBA75_31035	33556	33864	helix-turn-helix domain-containing protein CDS	Transposase IS3/IS911	leucine-zipper of insertion element IS481	helix-turn-helix domain-containing protein; HBA75_31035
HBA75_31040	33861	34742	IS3 family transposase CDS	Integrase	DDE domain	PROPHAGE_Escher_MG1655: IS150 transposase B; HBA75_31040; phage(gi16131429)
HBA75_31045	34802	35134	hypothetical protein CDS	Uncharacterized protein	C4-dicarboxylate transmembrane transporter activity	hypothetical protein; HBA75_31045
HBA75_31050	35277	36356	recA CDS	RecA	Can catalyze the hydrolysis of ATP in the presence of single-stranded DNA, the ATP-dependent uptake of single-stranded DNA by duplex DNA, and the ATP-dependent hybridization of homologous single-stranded DNAs. It interacts with LexA causing its activation and leading to its autocatalytic cleavage	PHAGE_Bacill_phi4J1_NC_029008: RecA; HBA75_31050; phage(gi971821630)
HBA75_31055	36499	36939	helicase DnaB CDS	Replicative DNA helicase loader DnaB	Membrane attachment protein	helicase DnaB; HBA75_31055
HBA75_31060	36997	37977	cytosolic protein CDS	Uncharacterized protein	Helix-turn-helix domain	PHAGE_Bacill_phi4J1_NC_029008: hypothetical protein; HBA75_31060; phage(gi971821635)

## Sheet: Table S5
Table S5. Strains dataset used for Bacillus cereus sensu lato unrooted phylogenetic tree (Figure 5).
Taxon	Strain	Assembly_accession	Level
Bacillus cereus ATCC 14579	ATCC 14579	GCA_000007825.1	Complete Genome
[Bacillus thuringiensis] serovar konkukian str. 97-27	97-27	GCA_000008505.1	Complete Genome
Bacillus cereus E33L	E33L	GCA_000011625.1	Complete Genome
Bacillus thuringiensis str. Al Hakam	Al Hakam	GCA_000015065.1	Complete Genome
Bacillus cereus G9842	G9842	GCA_000021305.1	Complete Genome
Bacillus thuringiensis BMB171	BMB171	GCA_000092165.1	Complete Genome
Bacillus thuringiensis serovar chinensis CT-43	CT-43	GCA_000193355.1	Complete Genome
Bacillus cereus F837/76	F837/76	GCA_000239195.1	Complete Genome
Bacillus cereus NC7401	NC7401	GCA_000283675.1	Complete Genome
Bacillus thuringiensis MC28	MC28	GCA_000300475.1	Complete Genome
Bacillus thuringiensis serovar thuringiensis str. IS5056	IS5056	GCA_000341665.1	Complete Genome
Bacillus thuringiensis YBT-1518	YBT1518	GCA_000497525.2	Complete Genome
Bacillus thuringiensis serovar israelensis	4Q7	GCA_000585975.1	Contig
Bacillus cereus	A1	GCA_000635895.2	Complete Genome
Bacillus thuringiensis serovar kurstaki str. HD-1	HD-1	GCA_000717535.1	Complete Genome
Bacillus cereus	03BB87	GCA_000789315.1	Complete Genome
Bacillus thuringiensis	HD1011	GCA_000832485.1	Complete Genome
Bacillus thuringiensis	HD682	GCA_000832925.1	Complete Genome
Bacillus thuringiensis HD1002	HD1002	GCA_000835025.1	Complete Genome
Bacillus cereus	S2-8	GCA_000835185.1	Complete Genome
Bacillus thuringiensis	YC-10	GCA_001017635.1	Complete Genome
Bacillus thuringiensis	CTC	GCA_001455345.1	Complete Genome
Bacillus cereus	FORC_013	GCA_001518875.1	Complete Genome
Bacillus thuringiensis	Bt185	GCA_001595725.1	Complete Genome
Bacillus cereus	CMCC P0011	GCA_001635955.1	Complete Genome
Bacillus cereus	HN001	GCA_001635995.1	Complete Genome
Bacillus thuringiensis serovar alesti	BGSC 4C1	GCA_001640965.1	Complete Genome
Bacillus thuringiensis serovar cameroun	BGSC 4AF1	GCA_002146365.1	Scaffold
Bacillus thuringiensis serovar silo	BGSC 4AG1	GCA_002146395.1	Contig
Bacillus thuringiensis serovar fukuokaensis	BGSC 4AP1	GCA_002146425.1	Scaffold
Bacillus thuringiensis serovar coreanensis	BGSC 4AL1	GCA_002146505.1	Contig
Bacillus thuringiensis serovar japonensis	BGSC 4AT1	GCA_002146545.1	Scaffold
Bacillus thuringiensis serovar canadensis	BGSC 4H2	GCA_002146925.1	Contig
Bacillus thuringiensis serovar malayensis	BGSC 4AV1	GCA_002146975.1	Scaffold
Bacillus thuringiensis serovar brasilensis	BGSC 4AY1	GCA_002146985.1	Contig
Bacillus thuringiensis serovar toumanoffi	BGSC 4N1	GCA_002147315.1	Scaffold
Bacillus thuringiensis serovar tohokuensis	BGSC 4V1	GCA_002147425.1	Contig
Bacillus thuringiensis serovar finitimus	CTC	GCA_002147505.1	Contig
Bacillus thuringiensis serovar higo	BGSC 4AU1	GCA_002147895.1	Contig
Bacillus thuringiensis serovar sylvestriensis	BGSC 4BY1	GCA_002147985.1	Contig
[Bacillus thuringiensis] serovar konkukian	BGSC 4AH1	GCA_002148025.1	Scaffold
Bacillus thuringiensis serovar dakota	BGSC 4R1	GCA_002148095.1	Scaffold
Bacillus thuringiensis	AFS021634	GCA_002563165.1	Scaffold
Bacillus thuringiensis	AFS052778	GCA_002575325.1	Scaffold
Bacillus cereus biovar thuringiensis	HER1410	This work	Complete Genome

## Sheet: Table S6
Table S6. Strains dataset used for HER1410-related strains phylogenetic tree (Figure 6).
Taxon	Strain	Assembly_accession	Level
Bacillus cereus ATCC 14579	ATCC 14579	GCA_000007825.1	Complete Genome
Bacillus cereus B4264	B4264	GCA_000021205.1	Complete Genome
Bacillus thuringiensis BMB171	BMB171	GCA_000092165.1	Complete Genome
Bacillus cereus m1550	m1550	GCA_000161035.1	Chromosome
Bacillus cereus BDRD-ST24	BDRD-ST24	GCA_000161055.1	Chromosome
Bacillus cereus BDRD-Cer4	BDRD-Cer4	GCA_000161115.1	Chromosome
Bacillus cereus Rock1-15	Rock1-15	GCA_000161175.1	Chromosome
Bacillus cereus AH676	AH676	GCA_000161355.1	Chromosome
Bacillus thuringiensis serovar pakistani str. T13001	T13001	GCA_000161555.1	Chromosome
Bacillus thuringiensis serovar huazhongensis BGSC 4BD1	BGSC 4BD1	GCA_000161675.1	Chromosome
Bacillus cereus VD200	VD200	GCA_000290715.1	Scaffold
Bacillus cereus VD169	VD169	GCA_000290735.1	Scaffold
Bacillus cereus VD166	VD166	GCA_000290755.1	Scaffold
Bacillus cereus VD156	VD156	GCA_000290775.1	Scaffold
Bacillus cereus VD154	VD154	GCA_000290795.1	Scaffold
Bacillus cereus VD045	VD045	GCA_000291215.1	Scaffold
Bacillus cereus VD014	VD014	GCA_000291255.1	Scaffold
Bacillus cereus VD196	VD196	GCA_000399125.1	Scaffold
Bacillus cereus VD184	VD184	GCA_000399565.1	Scaffold
Bacillus cereus	FSL R5-860	GCA_000518025.1	Contig
Bacillus cereus	B7-s	GCA_000520915.1	Contig
Bacillus thuringiensis Sbt003	Sbt003	GCA_000878525.1	Scaffold
Bacillus cereus	MIT0214	GCA_000935235.1	Contig
Bacillus cereus	FORC_005	GCA_000978375.1	Complete Genome
Bacillus cereus	B4080	GCA_001008595.1	Scaffold
Bacillus cereus	LK9	GCA_001043655.1	Contig
Bacillus cereus	#17	GCA_001044485.1	Scaffold
Bacillus cereus	INRA A3	GCA_001044655.1	Scaffold
Bacillus cereus	F4430-73	GCA_001044665.1	Contig
Bacillus cereus	INRA C3	GCA_001044715.1	Scaffold
Bacillus cereus	820_BCER	GCA_001058585.1	Scaffold
Bacillus cereus	823_BTHU	GCA_001059175.1	Scaffold
Bacillus cereus	822_BCER	GCA_001077095.1	Scaffold
Bacillus cereus	FORC_013	GCA_001518875.1	Complete Genome
Bacillus thuringiensis serovar tolworthi	Pasteur Institute Standard strain	GCA_001548175.1	Complete Genome
Bacillus cereus	DSM 626	GCA_001566705.1	Contig
Bacillus cereus	905	GCA_001579695.1	Scaffold
Bacillus cereus	FSL W8-0268	GCA_001583745.1	Contig
Bacillus cereus	FSL W8-0824	GCA_001583865.1	Contig
Bacillus thuringiensis	Bt185	GCA_001595725.1	Complete Genome
Bacillus cereus	B4081	GCA_001619285.1	Scaffold
Bacillus cereus	B4120	GCA_001619395.1	Scaffold
Bacillus cereus	B4155	GCA_001619405.1	Scaffold
Bacillus cereus	B4118	GCA_001619525.1	Scaffold
Bacillus cereus	HN001	GCA_001635995.1	Complete Genome
Bacillus thuringiensis	BGSC 4BT1	GCA_001677055.1	Scaffold
Bacillus cereus	MROC2	GCA_001677965.1	Contig
Bacillus cereus	AH725	GCA_001683705.1	Contig
Bacillus cereus	FORC_024	GCA_001721145.1	Complete Genome
Bacillus cereus	A50	GCA_001729445.1	Contig
Bacillus thuringiensis	GOE1	GCA_001757675.1	Contig
Bacillus thuringiensis	GOE2	GCA_001757685.1	Contig
Bacillus thuringiensis	GOE3	GCA_001757695.1	Contig
Bacillus cereus	N31	GCA_001883865.1	Contig
Bacillus cereus	A8S3	GCA_001883965.1	Contig
Bacillus cereus	Co15	GCA_001883975.1	Contig
Bacillus cereus	16SBCL1279	GCA_001895235.1	Scaffold
Bacillus cereus	BC04	GCA_001909175.1	Scaffold
Bacillus cereus	MOD1_Bc23	GCA_001913405.1	Contig
Bacillus cereus	MOD1_Bc77	GCA_001913625.1	Contig
Bacillus cereus	MOD1_Bc85	GCA_001913635.1	Contig
Bacillus cereus	MOD1_Bc149	GCA_001982855.1	Contig
Bacillus cereus	FORC021	GCA_002000005.1	Complete Genome
Bacillus cereus	FSL M8-0473	GCA_002014665.1	Contig
Bacillus cereus	FSL K6-1030	GCA_002014705.1	Contig
Bacillus cereus	FSL R5-0811	GCA_002014895.1	Contig
Bacillus cereus	MOD1_Bc71	GCA_002021445.1	Scaffold
Bacillus cereus	MOD1_Bc73	GCA_002021455.1	Scaffold
Bacillus cereus	MOD1_Bc92	GCA_002021465.1	Scaffold
Bacillus cereus	MOD1_Bc86	GCA_002021515.1	Scaffold
Bacillus cereus	MOD1_Bc93	GCA_002021535.1	Scaffold
Bacillus cereus	E41	GCA_002024535.1	Contig
Bacillus thuringiensis serovar nigeriensis	BGSC 4AZ1	GCA_002146465.1	Scaffold
Bacillus thuringiensis serovar rongseni	BGSC 4BT1	GCA_002146815.1	Scaffold
Bacillus thuringiensis serovar canadensis	BGSC 4H2	GCA_002146925.1	Contig
Bacillus thuringiensis serovar subtoxicus	BGSC 4I4	GCA_002146945.1	Contig
Bacillus thuringiensis serovar darmstadiensis	BGSC 4M3	GCA_002147295.1	Contig
Bacillus thuringiensis serovar aizawai	T07151	GCA_002147655.1	Scaffold
Bacillus thuringiensis serovar bolivia	T63001	GCA_002147715.1	Contig
Bacillus thuringiensis serovar pahangi	T69001	GCA_002147745.1	Contig
Bacillus thuringiensis serovar iberica	BGSC 4BW1	GCA_002147965.1	Scaffold
Bacillus thuringiensis serovar jegathesan	BGSC 4CF1	GCA_002148045.1	Scaffold
Bacillus thuringiensis	SCG04-02	GCA_002173755.1	Complete Genome
Bacillus cereus	MOD1_Bc207	GCA_002199335.1	Scaffold
Bacillus cereus	MOD1_Bc208	GCA_002199565.1	Scaffold
Bacillus cereus	MOD1_Bc203	GCA_002200015.1	Scaffold
Bacillus cereus	MOD1_Bc230	GCA_002200085.1	Contig
Bacillus cereus	MOD1_Bc218	GCA_002201555.1	Scaffold
Bacillus cereus	MOD1_Bc219	GCA_002201665.1	Scaffold
Bacillus cereus	D12_2	GCA_002214705.1	Complete Genome
Bacillus cereus	FORC_048	GCA_002214765.1	Complete Genome
Bacillus cereus	M13	GCA_002216125.1	Complete Genome
Bacillus cereus C1L	C1L	GCA_002224345.1	Complete Genome
Bacillus cereus	AFS099306	GCA_002550115.1	Scaffold
Bacillus cereus	AFS092659	GCA_002550775.1	Scaffold
Bacillus cereus	AFS012400	GCA_002557995.1	Scaffold
Bacillus cereus	AFS011918	GCA_002558245.1	Scaffold
Bacillus cereus	AFS004498	GCA_002558615.1	Scaffold
Bacillus cereus	AFS009840	GCA_002562215.1	Scaffold
Bacillus cereus	AFS082409	GCA_002565525.1	Scaffold
Bacillus cereus	AFS083741	GCA_002566215.1	Scaffold
Bacillus cereus	AFS070416	GCA_002567555.1	Scaffold
Bacillus cereus	AFS053406	GCA_002575135.1	Scaffold
Bacillus cereus	AFS049840	GCA_002575635.1	Scaffold
Bacillus cereus	AFS049141	GCA_002575715.1	Scaffold
Bacillus cereus	AFS030229	GCA_002583305.1	Scaffold
Bacillus cereus	AFS033081	GCA_002584465.1	Scaffold
Bacillus cereus	SJ-S23	GCA_002807165.1	Scaffold
Bacillus cereus	SJ-S21	GCA_002807215.1	Contig
Bacillus cereus	SJ-S17	GCA_002807265.1	Scaffold
Bacillus cereus	SJ-S28	GCA_002807415.1	Contig
Bacillus cereus	SJ-S27	GCA_002807445.1	Contig
Bacillus thuringiensis	78-2	GCA_002893515.1	Contig
Bacillus thuringiensis	HBF-18	GCA_002893585.1	Contig
Bacillus thuringiensis serovar japonensis	strain 62	GCA_002911785.1	Scaffold
Bacillus thuringiensis serovar entomocidus	BGSC 4I4	GCA_002911955.1	Contig
Bacillus cereus	FORC60	GCA_003020845.1	Complete Genome
Bacillus thuringiensis	BT62	GCA_003054785.2	Complete Genome
Bacillus cereus	NWUAB01	GCA_003298655.3	Scaffold
Bacillus thuringiensis	IPPBIOTSUC-C9F1	GCA_003408695.1	Scaffold
Bacillus cereus	HBL-AI	GCA_003568565.1	Complete Genome
Bacillus cereus	16-00196	GCA_900176805.1	Scaffold
Bacillus cereus	16-00198	GCA_900176935.1	Scaffold
Bacillus cereus	16-00184	GCA_900176955.1	Scaffold
Bacillus cereus	16-00187	GCA_900176995.1	Scaffold
Bacillus cereus	16-00188	GCA_900177025.1	Scaffold
Bacillus cereus	NCTC2599	GCA_900445355.1	Contig
Bacillus cereus biovar thuringiensis	HER1410	This work	Complete Genome
